# Supplementary material for: Prescriber and patient-oriented behavioural interventions to improve use of malaria rapid diagnostic tests in Tanzania: facility-based cluster randomised trial
Source: PubMed Central journal article supplement (PMC4445498; doi:10.1186/s12916-015-0346-z), 2015-05-15
Supplement: 12916_2015_346_MOESM1_ESM.pdf [file 12916_2015_346_MOESM1_ESM.pdf]

**Additional Table 1: Effect of interventions on (recommended) antimalarial prescribing among patients visiting facilities when there were no RDT or AL stock-outs**

|                                             | Arm     | Number of clusters | Number of patients | Prevalence n (%) | Crude RD <sup>†</sup> (95% CI) | Adjusted RD <sup>‡</sup> (95% CI) | p-value |
|---------------------------------------------|---------|--------------------|--------------------|------------------|--------------------------------|-----------------------------------|---------|
| Overall <sup>§</sup><br>(all ages)          | Control | 12                 | 8350               | 692 (8%)         | 0                              | 0                                 |         |
|                                             | HW      | 12                 | 9362               | 186 (2%)         | 0.06 (0.04, 0.09)              | 0.04 (0.01, 0.07)                 | 0.007   |
|                                             | HWP     | 12                 | 8402               | 145 (2%)         | 0.07 (0.04, 0.09)              | 0.04 (0.02, 0.06)                 | 0.002   |
| <5 years                                    | Control | 12                 | 2880               | 363 (13%)        | 0                              | 0                                 |         |
|                                             | HW      | 12                 | 3390               | 127 (4%)         | 0.09 (0.04, 0.14)              | 0.07 (0.002, 0.13)                | 0.04    |
|                                             | HWP     | 12                 | 2753               | 77 (3%)          | 0.09 (0.03, 0.14)              | 0.04 (0.008, 0.08)                | 0.02    |
| ≥5 years                                    | Control | 12                 | 5470               | 329 (6%)         | 0                              | 0                                 |         |
|                                             | HW      | 12                 | 5972               | 59 (1%)          | 0.05 (0.03, 0.07)              | 0.02 (0.008, 0.04)                | 0.004   |
|                                             | HWP     | 12                 | 5649               | 68 (1%)          | 0.05 (0.03, 0.07)              | 0.03 (0.01, 0.05)                 | 0.001   |
| <b>By Evaluation Period</b>                 |         |                    |                    |                  |                                |                                   |         |
| Standard training<br>(all arms)             | Control | 12                 | 611                | 44 (7%)          | 0                              | 0                                 |         |
|                                             | HW      | 9                  | 446                | 3 (1%)           | -                              | -                                 | -       |
|                                             | HWP     | 10                 | 489                | 38 (8%)          | -                              | -                                 | -       |
| Interactive training<br>(HW and HWP arms)   | Control | 12                 | 2892               | 220 (8%)         | 0                              | 0                                 |         |
|                                             | HW      | 12                 | 3162               | 82 (3%)          | 0.05 (0.02, 0.09)              | 0.03 (0.007, 0.06)                | 0.01    |
|                                             | HWP     | 12                 | 2915               | 42 (1%)          | 0.06 (0.03, 0.10)              | 0.03 (0.005, 0.05)                | 0.02    |
| Feedback SMS<br>(HW and HWP arms)           | Control | 12                 | 2393               | 215 (9%)         | 0                              | 0                                 |         |
|                                             | HW      | 12                 | 2807               | 58 (2%)          | 0.06 (0.04, 0.09)              | 0.03 (-0.001, 0.06)               | 0.06    |
|                                             | HWP     | 11                 | 2393               | 24 (1%)          | 0.07 (0.04, 0.10)              | 0.04 (0.01, 0.07)                 | 0.01    |
| Feedback + proverb SMS<br>(HW and HWP arms) | Control | 12                 | 1297               | 106 (8%)         | 0                              | 0                                 |         |
|                                             | HW      | 12                 | 1504               | 18 (1%)          | 0.07 (0.05, 0.09)              | 0.03 (0.007, 0.06)                | 0.02    |
|                                             | HWP     | 12                 | 1360               | 7 (0.5%)         | 0.07 (0.05, 0.09)              | 0.04 (0.02, 0.07)                 | 0.003   |

Notes:

† Adjusted for stratification. Effect estimate is risk difference = control – intervention

‡ Adjusted for facility (stratum, provision of materials, % fever consultations treated with antimalarial prior to the study, % non-febrile consultations treated with antimalarial prior to the study), health worker (age, education, time at facility) and patient (age) characteristics.

- Insufficient number of clusters per stratum or sample size per cluster to conduct a robust analysis

§ Defined as the period of evaluation from the end of the standard RDT training until the end of the trial.
