# Supplementary material for: Prescriber and patient-oriented behavioural interventions to improve use of malaria rapid diagnostic tests in Tanzania: facility-based cluster randomised trial
Source: PubMed Central journal article supplement (PMC4445498; doi:10.1186/s12916-015-0346-z), 2015-05-15
Supplement: 12916_2015_346_MOESM2_ESM.pdf [file 12916_2015_346_MOESM2_ESM.pdf]

**Additional Table 2: Effect of interventions on (recommended) antimalarial prescribing among patients in consultation with prescriber who attended training**

|                                          | Arm     | Number of clusters | Number of patients | Prevalence n (%) | Crude RD <sup>†</sup> (95% CI) | Adjusted RD <sup>‡</sup> (95% CI) | p-value |
|------------------------------------------|---------|--------------------|--------------------|------------------|--------------------------------|-----------------------------------|---------|
| Overall <sup>§</sup> (all ages)          | Control | 12                 | 8437               | 738 (9%)         | 0                              | 0                                 |         |
|                                          | HW      | 12                 | 8978               | 247 (3%)         | 0.06 (0.04, 0.09)              | 0.04 (0.01, 0.07)                 | 0.007   |
|                                          | HWC     | 12                 | 9875               | 176 (2%)         | 0.07 (0.04, 0.09)              | 0.04 (0.02, 0.07)                 | 0.002   |
| <5 years                                 | Control | 12                 | 2979               | 382 (13%)        | 0                              | 0                                 |         |
|                                          | HW      | 12                 | 3362               | 151 (4%)         | 0.09 (0.04, 0.14)              | 0.07 (0.008, 0.13)                | 0.03    |
|                                          | HWC     | 12                 | 3334               | 91 (3%)          | 0.09 (0.03, 0.15)              | 0.05 (0.009, 0.09)                | 0.02    |
| ≥5 years                                 | Control | 12                 | 5458               | 356 (7%)         | 0                              | 0                                 |         |
|                                          | HW      | 12                 | 5616               | 96 (2%)          | 0.05 (0.03, 0.07)              | 0.02 (0.007, 0.04)                | 0.008   |
|                                          | HWC     | 12                 | 6541               | 85 (1%)          | 0.05 (0.03, 0.07)              | 0.04 (0.02, 0.05)                 | 0.001   |
| <b>By Evaluation Period</b>              |         |                    |                    |                  |                                |                                   |         |
| Standard training (all arms)             | Control | 12                 | 650                | 48 (7%)          | 0                              | 0                                 |         |
|                                          | HW      | 8                  | 292                | 2 (1%)           | -                              | -                                 | -       |
|                                          | HWC     | 10                 | 489                | 38 (8%)          | -                              | -                                 | -       |
| Interactive training (HW and HWC arms)   | Control | 12                 | 3143               | 235 (7%)         | 0                              | 0                                 |         |
|                                          | HW      | 12                 | 3455               | 135 (4%)         | 0.05 (0.02, 0.08)              | 0.03 (-0.0004, 0.05)              | 0.05    |
|                                          | HWC     | 12                 | 3766               | 81 (2%)          | 0.05 (0.02, 0.09)              | 0.03 (0.001, 0.05)                | 0.04    |
| Feedback SMS (HW and HWC arms)           | Control | 12                 | 2178               | 210 (10%)        | 0                              | 0                                 |         |
|                                          | HW      | 12                 | 2546               | 57 (2%)          | 0.06 (0.04, 0.09)              | 0.03 (0.001, 0.06)                | 0.04    |
|                                          | HWC     | 12                 | 2745               | 19 (1%)          | 0.07 (0.05, 0.10)              | 0.04 (0.01, 0.07)                 | 0.007   |
| Feedback + proverb SMS (HW and HWC arms) | Control | 12                 | 1199               | 102 (8%)         | 0                              | 0                                 |         |
|                                          | HW      | 12                 | 1353               | 18 (1%)          | 0.07 (0.05, 0.09)              | 0.03 (0.006, 0.05)                | 0.02    |
|                                          | HWC     | 12                 | 1507               | 4 (0.3%)         | 0.08 (0.06, 0.10)              | 0.05 (0.02, 0.07)                 | 0.001   |

Notes:

† Adjusted for stratification. Effect estimate is risk difference = control – intervention

‡ Adjusted for facility (stratum, stock-out of ACT, provision of materials, % fever consultations treated with antimalarial prior to the study, % non-febrile consultations treated with antimalarial prior to the study), health worker (age, education, time at facility) and patient (age) characteristics.

- Insufficient number of clusters per stratum or sample size per cluster to conduct a robust analysis

§ Defined as the period of evaluation from the end of the standard RDT training until the end of the trial.
