# Supplementary material for: Prescriber and patient-oriented behavioural interventions to improve use of malaria rapid diagnostic tests in Tanzania: facility-based cluster randomised trial
Source: PubMed Central journal article supplement (PMC4445498; doi:10.1186/s12916-015-0346-z), 2015-05-15
Supplement: 12916_2015_346_MOESM3_ESM.pdf [file 12916_2015_346_MOESM3_ESM.pdf]

**Additional Table 3: Effect of interventions on secondary outcomes among patients visiting facilities during no RDT and/or AL stockouts**

|                                                                      | Arm     | Number of patients | Prevalence n (%) | Crude RD <sup>†</sup> (95% CI) | Adjusted RD <sup>‡</sup> (95% CI) | p-value |
|----------------------------------------------------------------------|---------|--------------------|------------------|--------------------------------|-----------------------------------|---------|
| Patients with fever treated with rAM <sup>a</sup>                    | Control | 8643               | 2071 (24%)       | 1                              | 1                                 |         |
|                                                                      | HW      | 9191               | 1485 (16%)       | 0.07 (0.02, 0.13)              | 0.03 (-0.04, 0.10)                | 0.42    |
|                                                                      | HWC     | 6792               | 1046 (15%)       | 0.08 (0.02, 0.14)              | 0.05 (0.002, 0.10)                | 0.04    |
| Patients with no fever treated with rAM <sup>a</sup>                 | Control | 4656               | 79 (2%)          | 1                              | 1                                 |         |
|                                                                      | HW      | 5713               | 166 (3%)         | -0.003 (-0.02, 0.02)           | 0.002 (-0.005, 0.01)              | 0.54    |
|                                                                      | HWC     | 4870               | 37 (1%)          | 0.01 (-0.01, 0.03)             | 0.002 (-0.01, 0.01)               | 0.75    |
| <b>RDT uptake</b>                                                    |         |                    |                  |                                |                                   |         |
| Patients with fever tested <sup>b</sup>                              | Control | 8977               | 4946 (55%)       | 1                              | 1                                 |         |
|                                                                      | HW      | 9445               | 5370 (57%)       | -0.05 (-0.16, 0.06)            | -0.05 (-0.22, 0.12)               | 0.54    |
|                                                                      | HWC     | 7650               | 5149 (67%)       | -0.13 (-0.22, -0.04)           | -0.02 (-0.13, 0.09)               | 0.70    |
| *RDT eligible not tested <sup>b</sup>                                | Control | 7959               | 3427 (43%)       | 1                              | 1                                 |         |
|                                                                      | HW      | 8719               | 3659 (42%)       | 0.05 (-0.06, 0.16)             | 0.07 (-0.10, 0.23)                | 0.39    |
|                                                                      | HWC     | 7016               | 2186 (31%)       | 0.13 (0.05, 0.22)              | 0.18 (0.05, 0.31)                 | 0.01    |
| *RDT ineligible (no fever) tested <sup>b</sup>                       | Control | 4780               | 586 (12%)        | 1                              | 1                                 |         |
|                                                                      | HW      | 5841               | 955 (16%)        | -0.02 (-0.07, 0.04)            | 0.004 (-0.07, 0.07)               | 0.91    |
|                                                                      | HWC     | 5900               | 518 (9%)         | 0.02 (-0.05, 0.09)             | 0.03 (-0.04, 0.09)                | 0.43    |
| <b>Presumptive treatment</b>                                         |         |                    |                  |                                |                                   |         |
| *RDT eligible treated presumptively for malaria <sup>b</sup>         | Control | 7959               | 308 (4%)         | 1                              | 1                                 |         |
|                                                                      | HW      | 8719               | 137 (2%)         | 0.02 (-0.01, 0.05)             | 0.02 (-0.004, 0.04)               | 0.11    |
|                                                                      | HWC     | 7016               | 71 (1%)          | 0.03 (0.001, 0.05)             | 0.02 (-0.001, 0.04)               | 0.07    |
| *RDT ineligible treated presumptively for malaria <sup>b</sup>       | Control | 4780               | 36 (1%)          | 1                              | 1                                 |         |
|                                                                      | HW      | 5841               | 15 (0.3%)        | 0.006 (0.001, 0.01)            | 0.004 (-0.0003, 0.008)            | 0.07    |
|                                                                      | HWC     | 5900               | 6 (0.1%)         | 0.007 (0.003, 0.01)            | 0.004 (0.0004, 0.008)             | 0.03    |
| <b>Adherence to RDT negative</b>                                     |         |                    |                  |                                |                                   |         |
| *RDT negative receiving AM <sup>a,b</sup>                            | Control | 3698               | 698 (19%)        | 1                              | 1                                 |         |
|                                                                      | HW      | 4328               | 233 (5%)         | 0.14 (0.08, 0.20)              | 0.09 (0.02, 0.15)                 | 0.01    |
|                                                                      | HWC     | 3783               | 163 (4%)         | 0.19 (0.04, 0.15)              | 0.09 (0.03, 0.15)                 | 0.006   |
| RDT negative receiving AM <sup>a,b</sup> (among those with fever)    | Control | 3228               | 660 (20%)        | 1                              | 1                                 |         |
|                                                                      | HW      | 3641               | 220 (6%)         | 0.15 (0.08, 0.22)              | 0.10 (0.02, 0.18)                 | 0.01    |
|                                                                      | HWC     | 3372               | 151 (4%)         | 0.17 (0.10, 0.23)              | 0.10 (0.03, 0.17)                 | 0.006   |
| RDT negative receiving AM <sup>a,b</sup> (among those with no fever) | Control | 470                | 38 (8%)          | 1                              | 1                                 |         |
|                                                                      | HW      | 687                | 13 (2%)          | 0.05 (-0.01, 0.10)             | 0.03 (0.01, 0.05)                 | 0.005   |
|                                                                      | HWC     | 411                | 12 (3%)          | 0.04 (-0.02, 0.10)             | -                                 | -       |

| Adherence to RDT positive                                                                                                                                                                                                                                                |         |      |            |                      |                     |      |
|--------------------------------------------------------------------------------------------------------------------------------------------------------------------------------------------------------------------------------------------------------------------------|---------|------|------------|----------------------|---------------------|------|
| RDT positive receiving rAM <sup>a,b</sup>                                                                                                                                                                                                                                | Control | 1272 | 1110 (88%) | 1                    | 1                   |      |
|                                                                                                                                                                                                                                                                          | HW      | 1422 | 1205 (85%) | -0.07 (-0.31, 0.16)  | -0.11 (-0.43, 0.22) | 0.49 |
|                                                                                                                                                                                                                                                                          | HWC     | 940  | 755 (80%)  | -0.16 (-0.39, 0.06)  | -0.03 (-0.25, 0.19) | 0.77 |
| * RDT positive receiving rAM <sup>a,b</sup><br>(among those with fever )                                                                                                                                                                                                 | Control | 1230 | 1103 (90%) | 1                    | 1                   |      |
|                                                                                                                                                                                                                                                                          | HW      | 1280 | 1083 (85%) | -0.04 (-0.27, 0.20)  | -0.09 (-0.42, 0.25) | 0.59 |
|                                                                                                                                                                                                                                                                          | HWC     | 884  | 736 (83%)  | -0.13 (-0.35, 0.08)  | 0.001 (-0.22, 0.23) | 0.99 |
| RDT positive receiving rAM <sup>a,b</sup><br>(among those without fever)                                                                                                                                                                                                 | Control | 42   | 7 (17%)    |                      |                     |      |
|                                                                                                                                                                                                                                                                          | HW      | 142  | 122 (86%)  | -                    | -                   |      |
|                                                                                                                                                                                                                                                                          | HWC     | 56   | 19 (34%)   | -                    | -                   |      |
| Treatment with Antibiotics                                                                                                                                                                                                                                               |         |      |            |                      |                     |      |
| Non-malarial illness receiving<br>ABx <sup>a,b</sup>                                                                                                                                                                                                                     | Control | 8350 | 6383 (76%) | 1                    | 1                   |      |
|                                                                                                                                                                                                                                                                          | HW      | 9362 | 7324 (78%) | 0.01 (-0.09, 0.12)   | 0.02 (-0.22, 0.26)  | 0.87 |
|                                                                                                                                                                                                                                                                          | HWC     | 8402 | 6258 (74%) | 0.02 (-0.04, 0.08)   | 0.15 (-0.01, 0.31)  | 0.07 |
| RDT negative receiving ABx <sup>a,b</sup>                                                                                                                                                                                                                                | Control | 3698 | 2723 (74%) | 1                    | 1                   |      |
|                                                                                                                                                                                                                                                                          | HW      | 4328 | 3396 (78%) | -0.02 (-0.12, 0.09)  | 0.01 (-0.23, 0.26)  | 0.92 |
|                                                                                                                                                                                                                                                                          | HWC     | 3783 | 2830 (75%) | 0.001 (-0.07, 0.07)  | 0.14 (-0.02, 0.30)  | 0.08 |
| RDT eligible receiving ABx <sup>a,b</sup>                                                                                                                                                                                                                                | Control | 7490 | 5258 (70%) | 1                    | 1                   |      |
|                                                                                                                                                                                                                                                                          | HW      | 8244 | 6367 (77%) | -0.04 (-0.14, 0.07)  | 0.01 (-0.22, 0.25)  | 0.90 |
|                                                                                                                                                                                                                                                                          | HWC     | 6059 | 4271 (70%) | -0.003 (-0.10, 0.09) | 0.14 (-0.04, 0.31)  | 0.11 |
| Notes: Number of clusters is 12 per arm for all outcomes                                                                                                                                                                                                                 |         |      |            |                      |                     |      |
| † Adjusted for stratification. Effect estimate is risk difference = control – intervention.                                                                                                                                                                              |         |      |            |                      |                     |      |
| ‡ Adjusted for facility (stock-out of ACT, stratum, provision of materials), health worker (age, education, time at facility) and patient (age) characteristics. Treatment outcomes additionally adjusted for facility-level proportion treated with rAM/AM at baseline. |         |      |            |                      |                     |      |
| - Insufficient clusters per stratum and cluster size to conduct a robust analysis.                                                                                                                                                                                       |         |      |            |                      |                     |      |
| a Evaluated among those who visited the facilities when there was no AL stock-outs.                                                                                                                                                                                      |         |      |            |                      |                     |      |
| b Evaluated among those who visited the facilities when there was on RDT stock-outs.                                                                                                                                                                                     |         |      |            |                      |                     |      |
